# Supplementary material
Source: PubMed Central journal article supplement (PMC7484899)
Supplement: NIHMS1624658-supplement-Supp.pdf [file NIHMS1624658-supplement-Supp.pdf]

## Supplemental Materials and Methods

2 **Subtotal nephrectomy:** 5/6 nephrectomies (5/6Nx) were performed under isoflurane  
anesthesia. Briefly, a left-flank incision exposed the left kidney, which was decapsulated to  
4 avoid ureter and adrenal damage, and the upper and lower poles were resected. The entire  
right kidney was decapsulated and removed via right-flank incision. Animals were maintained on  
6 normal chow diet throughout the entire study. At time of sacrifice, blood was collected with 10%  
volume sodium citrate and centrifuged at >10,000 rpm for 10 min to collect plasma. After PBS  
8 perfusion, tissues were dissected and snap-frozen in liquid nitrogen for long-term storage at -  
80°C. Hearts and ascending aorta were embedded in OCT and snap-frozen for sectioning.  
10 Endothelium of the descending aorta was lysed by flushing the aorta with Qiazol, as previously  
described<sup>1</sup>.

12 **HDL Isolation:** The study was approved by Vanderbilt University Institutional Review Board and  
written informed consent was obtained for each donor. Whole blood was collected by  
14 venipuncture into EDTA tubes from healthy donors. The whole blood was centrifuged for 15  
minutes at 4°C to separate the plasma from cells. The HDL was isolated from fresh plasma by  
16 density gradient ultracentrifugation with potassium bromide adjustment to obtain a density range  
of 1.063-1.21 g/mL<sup>2</sup>. HDL utilized for the *in vivo* studies was from a single donor or a pool of two  
18 donors so that the mice within a cohort all received the same source of HDL. The LNAs were  
complexed to HDL by overnight incubation at 37°C.

20 **Histology:** For cross-sectional analyses of the atherosclerotic lesions, OCT embedded hearts  
and ascending aortae were analyzed in consecutive 5µm sections (Leica CM3050s cryostat). To  
22 quantify lesion neutral lipid content, the sectioned aortas were stained with Oil-Red-O and  
presented as total lesion area (µm<sup>2</sup>), as previously described<sup>3</sup>. Macrophage positive areas of the  
24 cross-sectioned lesions were assessed by immunohistochemistry for CD68 (1:200, BioRAD,  
Hercules, CA) and MOMA-2 (Serotec, Raleigh, NC). Cryosections for MOMA-2 staining were  
26 fixed in acetone prior to staining, as previously described<sup>4, 5</sup>. To assess the collagen content,

proximal aorta cross-sections were stained with Masson's trichrome and aniline blue, as  
28 previously described<sup>6</sup>. The collagen positive area is expressed as a ratio of aniline blue-to-Oil  
red O staining.<sup>6</sup> To assess necrotic area in atherosclerotic lesions, proximal aorta cross-sections  
30 were stained with hematoxylin and eosin (H&E). Both stained lesion and acellular/anuclear  
areas in intimal lesions were quantified as total atherosclerotic lesions. Necrotic areas were  
32 calculated from the ratio of acellular/anuclear areas to total atherosclerotic lesion, as described  
previously<sup>5, 7</sup>. Lesion images were collected using a Nikon ECLIPSE E400 system and  
34 quantification of lesion staining was completed with Image J software by a technician blinded to  
the group assignments.

36

**Physiological Analyses:** Cholesterol Assay: Plasma cholesterol levels were quantified by  
38 colorimetric assays for total cholesterol, as per manufacturer's instructions (Wako). Assay  
microplates were read at 500nm wavelength on a Synergy Mx plate reader and total cholesterol  
40 levels were calculated using a standard curve. Blood urea nitrogen (BUN): Serum BUN levels  
were determined using a commercially available kit (BioAssay Systems, Hayward, CA) following  
42 the manufacturer's instructions, as previously described<sup>8</sup>. Blood pressure: Systolic blood  
pressure (SBP) levels were measured by tail-cuff plethysmography (BP-2000 Blood Pressure  
44 Analysis System, Visitech Systems) in trained conscious mice, as previously described<sup>5, 6, 9</sup>.

46 **Total RNA Sequencing:** High-throughput total RNA (mRNA) sequencing: Total RNA  
sequencing libraries were generated from 10 ng of total RNA isolated from aortic endothelium  
48 using Ovation RNA-Seq kits for model organisms (Nugen). Briefly, total RNA was DNase I  
digested and cDNA was synthesized by RT-PCR and fragmented using Covaris S2 system to  
50 produce fragments of approximately 250 bp (sweeping frequency, 10% duty cycle, intensity of 5,  
100 cycles/burst, 5 cycles of 60 s each). Blunt ends were generated by end-repair reaction  
52 followed by ligation of unique barcode adapters for each sample. Next, rRNA were removed by

insert-dependent adaptor cleavage (InDA-C) procedure and the final library was amplified by  
54 PCR (20 cycles). The library quantity and quality were analyzed by Qubit (Invitrogen) and  
Bioanalyzer (Agilent), respectively. Paired-end sequencing (PE75) was performed on the  
56 Illumina HiSeq3000 platform. Sequencing data analysis: Reads were trimmed to remove  
adaptor sequences using Cutadapt v1.16<sup>10</sup> and aligned to the GENCODE GRCm38.p5 genome  
58 using STAR v2.5.3a<sup>11</sup>. GENCODE vM12 gene annotations were provided to STAR to improve  
the accuracy of mapping. Quality control on both raw reads and adaptor-trimmed reads was  
60 performed using FastQC (www.bioinformatics.babraham.ac.uk/projects/fastqc). featureCounts  
v1.15.2<sup>12</sup> was used to count the number of mapped reads to each gene. Significantly differential  
62 expressed genes with p-value < 0.05 and absolute fold change > 1.5 were detected by DESeq2  
(v1.18.1)<sup>13</sup>. Pathway analysis was completed using MetaCore software (GeneGo).

64

**Cloning:** pAdtrack-CMV-FAM220A Vector: cDNA was reverse transcribed from total RNA  
66 isolated from (human) HEK293 cells using high-capacity cDNA RT kit (Life Technologies) with  
oligo dT primers. The coding region of *FAM220A* was amplified from cDNA using Phusion High-  
68 Fidelity DNA polymerase (New England BioLabs) with the following primers that added BglIII and  
XhoI restriction enzyme sites: forward primer 5'-  
70 AGATCTCACCATGAGGGACAGAAGAGGGCCCC-3', reverse primer 5'-  
CTCGAGGAACCTAAGGGCTGCACAGTTTG-3'. The amplified product (883 bp) was separated  
72 using an agarose gel and purified with a Zymoclean gel DNA recovery kit (Zymo Research). The  
amplified *FAM220A* coding region was cloned into a Zero Blunt Topo PCR Cloning Vector and  
74 transformed into *E. coli* (Invitrogen). The *FAM220A* coding region was digested out of the Topo  
vector with BglIII and XhoI (New England BioLabs) and gel-purified as previous described. The  
76 purified fragment was ligated into a pAdtrack-CMV<sup>143</sup> vector using T4 ligase (Promega). The  
pAdtrack-CMV-FAM220A vector was confirmed by PCR, restriction enzyme digestion, and  
78 Sanger sequencing. All vector purifications were performed with either Wizard Plus SV

Minipreps DNA purification system (Promega) or PureLink HiPure plasmid midiprep kit  
80 (Invitrogen). Luciferase constructs: The full length Human *FAM220A* 3'UTR was cloned down-  
stream of Firefly luciferase in the pEZX-MT06 gene reporter construct which also contains a  
82 transfection control *Renilla* luciferase gene (Genecopeia). Site-directed mutagenesis was  
performed using custom designed mutagenesis primers (Agilent Quikchange Primer Design  
84 tool) to generate a 2 base pair deletion within the putative miR-92a-3p target sites harbored in  
the human *FAM220A* 3' UTR using the Quikchange II site-directed mutagenesis kit (Agilent), as  
86 per manufacturer's instructions. The mutation was confirmed by Sanger sequencing. The  
putative targets sites for miR-92a-3p in the mouse *Fam220a* 3' UTR and miR-489-3p in the  
88 *Tgfb2* 3' UTR were also cloned separately into pEZX-MT01 reporter constructs down-stream of  
Firefly luciferase. Briefly, oligonucleotides of the 35-40 bp sequence including the putative target  
90 site and surrounding sequence were phosphorylated with T4 polynucleotide kinase (New  
England Biolabs) at 37°C for 30 minutes followed phenol chloroform purification. The  
92 phosphorylated oligonucleotides were denaturation and slowly cooled to anneal the  
oligonucleotides. The annealed oligonucleotides were ligated into XhoI and XbaI digested  
94 pEZX-MT01 vector (Genecopeia) with T4 DNA ligase (Promega) at RT for 1 hr followed by  
transformation into *E. coli* (Invitrogen). The pEZX-MT01 vectors containing miRNA target sites  
96 were confirmed by PCR, restriction enzyme digestion, and Sanger sequencing. All vector  
purifications performed with either Wizard Plus SV Minipreps DNA purification system  
98 (Promega) or PureLink HiPure plasmid midiprep kit (Invitrogen).

100 **Gene reporter (luciferase) assays:** HEK293 cells were dually transfected with gene reporter  
luciferase constructs (described above) in the absence and presence of 50nM miR-92a-3p or  
102 miR-489-3p mimetics using Dharmafect Duo transfection reagent (Dharmacon). To quantify  
Firefly and *Renilla* luciferase activity 48 h post-transfection, luc-pair duo-luciferase assay kit 2.0  
104 (Genecopeia) was used, according to manufacturer's instructions. Firefly luciferase activity were

normalized to transfection control *Renilla* luciferase activity, and ratios were reported as fold  
106 changes to the control cells that received no mimetics.

108 **Western Blotting:** Total protein was isolated from scraped cells using RIPA buffer containing  
Halt phosphatase and protease inhibitors (Thermofisher). After 1 h of rotation at 4°C, cell debris  
110 were removed by centrifugation and protein concentrations were quantified by Pierce BCA  
assays (Thermofisher). Total protein lysates were analyzed by gel electrophoresis on NuPAGE  
112 4-12% Bis-Tris gels (Invitrogen) and transferred to nitrocellulose membranes using the iblot  
system (Invitrogen). Membranes were blocked in 5% milk TBS + 0.1% tween (TBS-T) for 30 min  
114 followed by incubation with mouse anti-STAT3 (1:5,000, BD Biosciences), rabbit anti-STAT3  
pY705 (1:2,000, diluted in TBS-T + 5% BSA, Cell Signaling), or mouse anti-GAPDH (1:10,000,  
116 Sigma) antibodies diluted in 5% milk TBS-T overnight at 4°C. Horseradish peroxidase (HRP)  
conjugated anti-mouse (1:15,000, Promega) and HRP-anti-rabbit (1:20,000, Promega)  
118 secondary antibodies were diluted in 5% milk TBS-T and incubated for 1 h at RT. Membranes  
were developed using Western lightening plus (Perkin Elmer) or Amersham ECL prime (GE)  
120 reagents and exposed to x-ray film (Phenix). Western blot band density was calculated using  
Image J software.

122

### Supplemental References

- 124 1. Nam D, Ni CW, Rezvan A, Suo J, Budzyn K, Llanos A, Harrison DG, Giddens DP and Jo H. A model  
of disturbed flow-induced atherosclerosis in mouse carotid artery by partial ligation and a simple  
126 method of RNA isolation from carotid endothelium. *J Vis Exp*. 2010.
- 128 2. Mitchell DL, Allen RM, Landstreet SR, Zhao S, Toth CL, Sheng Q and Vickers KC. Isolation of High-  
density Lipoproteins for Non-coding Small RNA Quantification. *J Vis Exp*. 2016.
- 130 3. Purcellhuynh DA, Farese RV, Johnson DF, Flynn LM, Pierotti V, Newland DL, Linton MF, Sanan DA  
and Young SG. Transgenic Mice Expressing High-Levels of Human Apolipoprotein-B Develop Severe  
Atherosclerotic Lesions in Response to a High-Fat Diet. *J Clin Invest*. 1995;95:2246-2257.
- 132 4. Suganuma E, Zuo YQ, Ayabe N, Ma J, Babaev VR, Linton MF, Fazio S, Ichikawa I, Fogo AB and Kon  
V. Antiatherogenic effects of angiotensin receptor antagonism in mild renal dysfunction. *J Am Soc*  
134 *Nephrol*. 2006;17:433-441.

- 136 5. Yamamoto S, Zuo YQ, Ma J, Yancey PG, Hunley TE, Motojima M, Fogo AB, Linton MF, Fazio S,  
138 Ichikawa I and Kon V. Oral activated charcoal adsorbent (AST-120) ameliorates extent and instability of  
140 atherosclerosis accelerated by kidney disease in apolipoprotein E-deficient mice. *Nephrol Dial Transpl.*  
142 2011;26:2491-2497.
- 140 6. Suganuma E, Babaev VR, Motojima M, Zuo Y, Ayabe N, Fogo AB, Ichikawa L, Linton MF, Fazio S  
142 and Kon V. Angiotensin inhibition decreases progression of advanced atherosclerosis and stabilizes  
144 established atherosclerotic plaques. *J Am Soc Nephrol.* 2007;18:2311-2319.
- 142 7. Seimon TA, Wang YB, Han S, Senokuchi T, Schrijvers DM, Kuriakose G, Tall AR and Tabas IA.  
144 Macrophage deficiency of p38 alpha MAPK promotes apoptosis and plaque necrosis in advanced  
146 atherosclerotic lesions in mice. *J Clin Invest.* 2009;119:886-898.
- 146 8. Han SJ, Jang HS, Noh MR, Kim J, Kong MJ, Kim JI, Park JW and Park KM. Mitochondrial NADP(+)-  
148 Dependent Isocitrate Dehydrogenase Deficiency Exacerbates Mitochondrial and Cell Damage after  
150 Kidney Ischemia-Reperfusion Injury. *J Am Soc Nephrol.* 2017;28:1200-1215.
- 148 9. Yamamoto S, Zhong JY, Yancey PG, Zuo YQ, Linton MF, Fazio S, Yang HC, Narita I and Kon V.  
150 Atherosclerosis following renal injury is ameliorated by pioglitazone and losartan via macrophage  
152 phenotype. *Atherosclerosis.* 2015;242:56-64.
- 152 10. Martin M. Cutadapt removes adapter sequences from high-throughput sequencing reads.  
154 *EMBnetjournal.* 2011;17:10-12.
- 154 11. Dobin A, Davis CA, Schlesinger F, Drenkow J, Zaleski C, Jha S, Batut P, Chaisson M and Gingeras  
156 TR. STAR: ultrafast universal RNA-seq aligner. *Bioinformatics.* 2013;29:15-21.
- 156 12. Liao Y, Smyth GK and Shi W. featureCounts: an efficient general purpose program for assigning  
158 sequence reads to genomic features. *Bioinformatics.* 2014;30:923-930.
- 158 13. Love MI, Huber W and Anders S. Moderated estimation of fold change and dispersion for RNA-  
160 seq data with DESeq2. *Genome Biol.* 2014;15.
- 160 14. Luo J, Deng ZL, Luo X, Tang N, Song WX, Chen J, Sharff KA, Luu HH, Haydon RC, Kinzler KW,  
162 Vogelstein B and He TC. A protocol for rapid generation of recombinant adenoviruses using the AdEasy  
164 system. *Nat Protoc.* 2007;2:1236-1247.

164

## Supplemental Figure Legends

### **Supplemental Figure 1: Isolation of mouse aortic endothelium for RNA analyses. (A)**

166 Illustration of method used to shear the aorta endothelial cells for total RNA isolation. **(B)** Real-time PCR quantification of the endothelial cell marker *Pecam1* and smooth muscle cell marker *Acta2* in the endothelium, remaining aortae, and whole aortae. N=5-6.

### **Supplemental Figure 2: LNA-92a inhibits endothelial miR-92a-3p levels.**

170 Real-time PCR quantification of miR-92a-3p for aorta endothelium of *Apoe*<sup>-/-</sup> mice treated with HDL, LNA-92a, and HDL complexed with LNA-92a. N=3. One-way ANOVA with Bonferroni  $\alpha=0.016$ .

### **Supplemental Figure 3: LNA inhibition of miR-92a-3p and miR-489-3p levels in remaining**

172 **aortae and liver.** Real-time PCR quantification of miR-92a-3p for **(A)** remaining aorta after shearing/isolation of endothelium and **(B)** liver. N=4. **(C)** Real-time PCR quantification of miR-489-3p for remaining aorta after shearing/isolation of endothelium. N=4. One-way ANOVA with Bonferroni  $\alpha=0.01$ .

### **Supplemental Figure 4: Histology for atherosclerotic lesion collagen content.**

178 Histological images for aortic cross-sections for collagen content stained with Masson's trichrome stain. Scale bar represents 100 $\mu$ m.

### **Supplemental Figure 5: Dual inhibition of miR-92a-3p and miR-489-3p failed to alter total macrophage content.**

180 **(A)** Immunohistochemical images of aortic cross-sections for macrophage marker MOMA-2. **(B)** Quantification of inflammatory cell content by MOMA-2 staining normalized by total lesion area (Oil-Red-O, ORO) for *Apoe*<sup>-/-</sup>;5/6Nx treated mice. One-way ANOVA. N=5-13. Scale bar represents 500 $\mu$ m.

### **Supplemental Figure 6: Systolic blood pressure and blood urea nitrogen levels.**

186 **(A)** SBP and **(B)** BUN of *Apoe*<sup>-/-</sup>;5/6nx cohort 8 weeks after surgery and 1 week post-injection. One-way ANOVA with Bonferroni  $\alpha=0.025$ . N=4-6.

188 **Supplemental Figure 7: Plasma total cholesterol levels.** Locked-nucleic acid (LNA) dual  
inhibition of miR-92a-3p and miR-489-3p. Quantification of plasma total cholesterol of *ApoE*<sup>-/-</sup>  
190 ;5/6Nx mice. One-way ANOVA with Bonferroni correction  $\alpha=0.008$ . N=13-20.

**Supplemental Figure 8: Differential gene expression for locked nucleic acid (LNA) miRNA  
192 inhibition in *ApoE*<sup>-/-</sup>;5/6Nx mice.** MA plot of the log<sub>10</sub> DESeq2 normalized mean expression  
and the log<sub>2</sub> fold change of aortic endothelial gene expression for (A) HDL, (B) HDL+LNA-92a,  
194 and (C) HDL+LNA-489 compared to saline control with significantly altered genes determined  
by DESEQ2 analysis highlighted in red. Fold change  $\geq 1.5$  indicated by the green lines. N=4.  
196 Venn diagrams of (D) significantly up-regulated genes and (E) significantly down-regulated  
genes.

198 **Supplemental Figure 9: miR-92a-3p regulation of FAM220A and STAT3 activation in  
human endothelial cells.** Real-time PCR quantification of (A) miR-92a-3p and (B) miR-489-3p  
200 suppression post transfection of LNAs in HCAEC. N=9. (C) Real-time PCR quantification of  
*FAM220A* in HCAEC transfected with multiple concentrations of LNA-92a. N=9. (D) Real-time  
202 PCR quantification of miR-92a-3p overexpression in HCAEC transfected with miR-92a-3p mimic  
and siRNA *FAM220A*. N=8-12. Quantification of western blots for (E) P-STAT3 and (F) total  
204 STAT3 to GAPDH for miR-92a-3p overexpression in HCEAC. N=8. Mann-Whitney non-  
parametric tests were used for comparisons between two groups. One-way ANOVA with  
206 Bonferroni  $\alpha=0.025$  were used for two comparisons and Bonferroni  $\alpha=0.017$  were used for three  
comparisons.
